1                   **Structural, *in silico*, and functional analysis of a Disabled-2-derived peptide**

2                                   **for recognition of sulfatides**

3  
4                   Wei Song <sup>a</sup>, Carter J. Gottschalk <sup>b</sup>, Tuo-Xian Tang <sup>a</sup>, Andrew Biscardi <sup>a</sup>, Jeffrey F. Ellena <sup>c</sup>

5                                   Carla V. Finkielstein <sup>d</sup>, Anne M. Brown <sup>b</sup>, and Daniel G. S. Capelluto <sup>a,\*</sup>

6  
7                   <sup>a</sup> Protein Signaling Domains Laboratory, Department of Biological Sciences, Fralin Life Sciences Institute,  
8                   and Center for Soft Matter and Biological Physics, Virginia Tech, Blacksburg, VA 24061, United States; <sup>b</sup>  
9                   Research and Informatics, University Libraries, Biochemistry Department, and Center for Drug Discovery,  
10                   Virginia Tech, Blacksburg, VA, United States; <sup>c</sup> Biomolecular Magnetic Resonance Facility, University of  
11                   Virginia, Charlottesville VA, 22904, United States; <sup>d</sup> Integrated Cellular Responses Laboratory,  
12                   Department of Biological Sciences, Fralin Life Sciences Institute, and Center for Drug Discovery, Virginia  
13                   Tech, Blacksburg, VA 24061, United States.

14  
15                   \* Corresponding author: Tel: + 540 231-0974; E-mail address: [capellut@vt.edu](mailto:capellut@vt.edu)

16  
17                   Running Title: The sulfatide-binding site in Disabled-2

18  
19                   Abbreviations: CD, circular dichroism; Dab2, Disabled-2; DPC, dodecylphosphocholine; GST, glutathione  
20                   s-transferase; N-PTB, N-terminus containing the phosphotyrosine-binding domain; SBP, sulfatide-binding  
21                   peptide; SPR, surface plasmon resonance.

24 **Abstract**

25

26 Disabled-2 (Dab2) is an adaptor protein that regulates numerous cellular processes. Among them, Dab2  
27 modulates the extent of platelet aggregation by two mechanisms. In the first mechanism, Dab2  
28 intracellularly downregulates the integrin  $\alpha_{IIb}\beta_3$  receptor, converting it to a low affinity state for adhesion  
29 and aggregation processes. In the second mechanism, Dab2 is released extracellularly and interacts with  
30 both the integrin  $\alpha_{IIb}\beta_3$  receptor and sulfatides, both of which are known to be pro-aggregatory mediators,  
31 blocking their association to fibrinogen and P-selectin, respectively. Our previous research indicated that a  
32 35-amino acid region within Dab2, which we refer to as the sulfatide-binding peptide (SBP), contains two  
33 potential sulfatide-binding motifs represented by two consecutive polybasic regions. Using a combined  
34 methodology including molecular docking, nuclear magnetic resonance, lipid-binding assays, and surface  
35 plasmon resonance, this work identifies the critical Dab2 residues within SBP that are responsible for  
36 sulfatide binding. A hydrophilic region, primarily mediated by R42, is responsible for the interaction with  
37 the sulfatide headgroup, whereas the C-terminal polybasic region contributes to interactions with the acyl  
38 chains. Furthermore, we demonstrated that, in Dab2 SBP, R42 significantly contributes to the inhibition of  
39 platelet P-selectin surface expression. The interacting Dab2 SBP residues with sulfatide resemble those  
40 described for sphingolipid-binding in other proteins, suggesting that sulfatide-binding proteins share  
41 common binding mechanisms.

42

43

44 Keywords: Disabled-2; sulfatide; liposome; platelets; molecular docking; surface plasmon resonance;  
45 integrin receptor.

46

## 47 INTRODUCTION

48

49 The adaptor protein Disabled-2 (Dab2) is a multimodular signaling molecule involved in a variety of  
50 cellular processes including protein trafficking, cell growth and differentiation, cell adhesion, and  
51 modulation of platelet aggregation (1). Two Dab orthologs, Dab1 and Dab2, are present in mammals. Dab1  
52 is primarily expressed in the brain (2), whereas Dab2 is ubiquitously expressed in different tissues (3, 4).  
53 Dab2 expression levels have been reported to exhibit a significant effect on cancer initiation and  
54 progression. Indeed, Dab2 expression is lost in breast, ovarian, prostate (5), bladder (6), and colorectal  
55 cancer cells (7), suggesting that Dab2 can act as a tumor suppressor (8). Two alternative spliced forms of  
56 Dab2 are expressed in humans, p96 and p67, with the latter lacking a central exon (3). Dab2 contains a  
57 phosphotyrosine-binding (PTB) domain located at the N-terminus, clathrin-binding sites, NPF and DPF  
58 motifs, and a proline-rich SH3 domain located at the C-terminus, indicating that Dab2 primarily functions  
59 as an adaptor protein.

60

61 Recently, Dab2 was characterized as a negative regulator of platelet aggregation by modulating both pro-  
62 aggregatory inside-out and outside-in signaling pathways (1). Modulation of the inside-out signaling by  
63 Dab2 is mediated by its cytosolic S24-phosphorylated form, which binds to the  $\beta_3$  subunit of the integrin  
64  $\alpha_{IIb}\beta_3$  receptor, downregulating fibrinogen-mediated adhesion (9). In outside-in signaling, ligand-receptor  
65 complexes on activated platelets promote platelet spreading, granule secretion, stabilization of the adhesion  
66 and aggregation of platelets, and clot retraction (10). Some of the components of the intracellular granules  
67 are required to limit the extent of platelet activation, adhesion, and aggregation. Platelet function must be  
68 tightly modulated, as uncontrolled platelet activation can trigger unwanted clinical complications such as  
69 thrombocytopenia and thrombosis (11). Dab2 is released from  $\alpha$ -granules and relocates to the platelet  
70 surface where it modulates outside-in signaling (12). To do this, Dab2 presents two extracellular targets.  
71 At the platelet membrane surface, Dab2 associates with the extracellular domain of the  $\alpha_{IIb}$  subunit of the

72 integrin receptor *via* its RGD motif, preventing integrin-fibrinogen interactions. Dab2 also binds to  
73 sulfatides (13), a class of negatively charged sphingolipids found on most eukaryotic cell surfaces (14).  
74 Interestingly, cleavage of Dab2 by the platelet agonist thrombin may be prevented when Dab2 is associated  
75 with the sphingolipid (13). Binding of Dab2 to sulfatides limits P-selectin association to sulfatides (15),  
76 which is required to prolong platelet aggregation (16).

77  
78 Initial studies reported that Dab2 binds sulfatides at its N-terminus including the PTB domain (N-PTB;  
79 residues 1-241 in human Dab2) (13). Combined mutations in residues K25, K49, K51, and K53 markedly  
80 reduce sulfatide binding and platelet aggregation (13). Further studies showed that an  $\alpha$ -helical-rich region  
81 of 35 amino acids within the Dab2 N-PTB, which was predicted to contain two potential sulfatide-binding  
82 motifs (referred to as the sulfatide-binding peptide, SBP), mimic the inhibitory platelet-platelet interaction  
83 effects of Dab2 N-PTB (17). In this report, by using a combination of structural, molecular docking, and  
84 functional approaches, we refined the mode by which SBP, the minimal sulfatide-binding unit derived from  
85 Dab2, associates with sulfatides. We found that the Dab2 SBP residues around  $\alpha$ -helix 1 are required for  
86 interactions with the sulfatide head group, whereas helix 2 mediates sulfatide acyl chain interactions.  
87 Furthermore, we predict that R42, located in the first  $\alpha$ -helix of Dab2 SBP, forms hydrogen bonds with the  
88 OS atoms of the sulfate group in the sulfatide. We show that both the charge and stereochemistry of R42 is  
89 critical for Dab2 SBP's sulfatide recognition and inhibition of platelet P-selectin surface expression. Results  
90 from this report provide details of how Dab2 interacts with sulfatides, which can be used for the design of  
91 a Dab2-derived peptide that can block sulfatide interactions, and, consequently, prevent undesired platelet  
92 aggregation events.

93

94

95

## 96 MATERIAL AND METHODS

### 97 Chemicals

98 The list of chemicals and their suppliers are: brain sulfatides, 1,2-dipalmitoyl-sn-glycero-3-phosphocholine  
99 (DPPC), 1,2-dipalmitoyl-sn-glycero-3-phosphoethanolamine (DPPE) (Avanti-Lipids), N-  
100 dodecylphosphocholine (DPC) (Anatrace), cholesterol (Sigma), and isopropyl  $\beta$ -D-thiogalactopyranoside  
101 (IPTG) (Research Products International). All other chemicals were of analytical grade.

### 102 Expression and purification of Dab2 SBP

103 A cDNA, representing residues 24-58 in human Dab2, was cloned into a pGEX6P1 vector (GE Healthcare).  
104 A glutathione S-transferase (GST) fusion and untagged Dab2 SBP were expressed and purified as described  
105 (18). Site-directed mutagenesis of Dab2 SBP was carried out using the QuikChange (Stratagene) protocol.

### 106 Creation and validation of Dab2 SBP models

107 Energy minimized Dab2 SBP and its mutant structures were created with Schrödinger-Maestro v2018-3  
108 (19), using the NMR-derived, Dab2 SBP DPC-micelle embedded structure [PDB ID: 2LSW (17)] as a  
109 template. To align with the experimental peptide sequence in this work, residues 19-23 (GPLGS) were built  
110 onto the N-terminus of PDB ID: 2LSW using Schrödinger-Maestro's 3D-Builder. Following the addition  
111 of residues 19-23 to the template structure, energy minimization was performed using the OPLS3e  
112 forcefield (20) and default settings in Schrödinger-Maestro v2018-3. After energy minimization, the Dab2  
113 SBP structure was exported into PDB format and model quality was assessed using several validation  
114 methods. Ramachandran plots generated using the Rampage webserver (21) assessed model quality with  
115 respect to favorable and allowed  $\phi$  and  $\psi$  angles of residues, and SWISS-MODEL (22, 23) calculated a  
116 QMEAN plot to quantify model quality with respect to solvation and torsion angle. ProSA (24, 25)  
117 compared the model to experimentally derived structures similar in composition. Five mutant peptides were  
118 individually created using the energy minimized Dab2 SBP structure as the starting template. Each mutation

119 (Y38A, R42A, R42K, K49A/K51A/K53A, and Y50A) was built using Schrödinger-Maestro (19) by  
120 altering the residue(s) of interest using the built-in mutagenesis tool. Following residue alteration, energy  
121 minimization was performed as stated above. Structures were exported as PDB files and model quality was  
122 assessed using the same procedure as Dab2 SBP, with varying validation quality as influenced by the point  
123 mutations.

#### 124 **Molecular docking of Dab2 SBP variants to sulfatide**

125 The structure of sulfatide was obtained from the ZINC database (ZINC96006133) and converted from the  
126 mol2 to the PDB format using UCSF Chimera (26). Sulfatide and Dab2 SBP and point mutation structures  
127 were prepared in AutoDockTools v1.5.6 (27) and sulfatide was docked to each Dab2 SBP energy minimized  
128 structure using AutoDock Vina v1.1.2 (28). The same grid box and center was used for each docking  
129 experiment and covered the entire Dab2 SBP structure. The center coordinates for the grid box (X, Y, Z)  
130 were (-1.722, 0.667, -2.2194). The grid box dimensions (X, Y, Z) were (30Å, 46Å, 42Å), using a 1 Å grid  
131 space. Nine poses were created from each docking run, with the lowest energy pose used for further analysis  
132 on residue interaction and fingerprint analysis. Molecular visualization of docked poses was performed in  
133 PyMOL (29). Sulfatide pose volume occupancy was visualized using UCSF Chimera (26). Schrödinger-  
134 Maestro's Interaction Fingerprints analysis tool was used with default parameters on each lowest energy  
135 docked pose to determine potential peptide-sulfatide interactions. The output matrix was converted  
136 manually to a table format and organized by interaction type.

#### 137 **NMR spectroscopy**

138 <sup>15</sup>N-labeled Dab2 SBP (1 mM) was prepared in 90% H<sub>2</sub>O, 10% <sup>2</sup>H<sub>2</sub>O, 10 mM *d*<sub>4</sub>-citrate (pH 5.0), 40 mM  
139 KCl, 1 mM NaN<sub>3</sub>, and 200 mM *d*<sub>38</sub>-DPC in the absence or presence of 8 mM sulfatide. A Bruker Avance III  
140 800 spectrometer with cryoprobe and standard Bruker two dimensional <sup>1</sup>H-<sup>15</sup>N HSQC-type pulse sequences  
141 were used to obtain <sup>15</sup>N longitudinal (*R*<sub>1</sub>) and transverse (*R*<sub>2</sub>) relaxation rates, and <sup>1</sup>H-<sup>15</sup>N NOEs of Dab2  
142 SBP in the absence and presence of sulfatide at 25°C. Relaxation delays for the *R*<sub>1</sub> experiments were 5, 50,

143 150, 250, 400, 550, 750, 1200, and 2000 ms. Relaxation delays for the  $R_2$  experiments were 17, 34, 51, 68,  
144 119, 153, 203, and 254 ms. The recycle delay for  $R_1$  and  $R_2$  experiments was 2 s.  $^1\text{H}$ - $^{15}\text{N}$  NOEs were  
145 measured by comparing intensities of  $^1\text{H}$ - $^{15}\text{N}$  correlation spectra with either 5 s of  $^1\text{H}$  saturation or a 5 s  
146 delay preceding  $^1\text{H}$ - $^{15}\text{N}$  correlation.

#### 147 **Lipid-protein overlay assay**

148 Sulfatide strips were prepared by spotting 1  $\mu\text{l}$  of the indicated amount of sulfatides, dissolved in  
149 chloroform/methanol/water (1:2:0.8), onto a Hybond-C extra membranes (GE Healthcare). Membrane  
150 strips were blocked with 3% fatty acid-free BSA (Sigma) in 20 mM Tris-HCl (pH 8.0), 150 mM NaCl, and  
151 0.1% Tween-20 for 1 h at room temperature. Then, membrane strips were incubated with the indicated GST  
152 fusion peptide in the same buffer overnight at 4°C. Following four washes with the same buffer, bound  
153 fusion proteins were detected with rabbit anti-GST antibody (Proteintech) and donkey anti-rabbit-  
154 horseradish peroxidase antibody (GE Healthcare). Binding of fusion peptides to sulfatides was probed using  
155 the Supersignal West Pico chemiluminescent reagent (Pierce).

#### 156 **Surface plasmon resonance**

157 Binding of Dab2 SBP peptides to sulfatide liposomes were monitored by surface plasmon resonance (SPR)  
158 at room temperature using a BIAcore X-100 instrument (GE Healthcare). One-hundred nanometer size-  
159 calibrated liposomes were generated as previously described (13). Briefly, lipids including  
160 DPPC:DPPE:cholesterol (1:1:1; control), or DPPC:DPPE:cholesterol:sulfatide (1:1:1:4), were solubilized  
161 in chloroform/methanol/water mixtures. The resulting mixture was dried under  $\text{N}_2$  followed by vacuum to  
162 remove solvent traces. Lipid mixture was then resuspended at 0.8 mg/ml in 20 mM Tris-HCl (pH 6.8) and  
163 100 mM NaCl to reach a final concentration of 0.5 mM sulfatide, sonicated, and extruded for 100-nm  
164 liposome size at 68°C. L1 sensorchips were first equilibrated with 20 mM Tris-HCl (pH 7.4) and 100 mM  
165 NaCl as a running buffer. Then, L1 sensorchips were pretreated with 40 mM octyl  $\beta$ -D-glucopyranoside.  
166 At a 30 ml/min flow rate, control liposomes were immobilized onto one of the L1 sensorchip channels

167 whereas a second channel was loaded with sulfatide-containing liposomes. Typical liposome loading was  
168 ~4,000 response units/sensorchip channel. The apparent  $K_D$  values were estimated using the BIAevaluation  
169 software, version 2.0 (GE Healthcare).

#### 170 **Blood collection and platelet purification**

171 Blood samples were obtained from healthy volunteers by venipuncture, according to Virginia Tech  
172 Institutional Review Board guidelines. Blood samples were collected into vacutainer ACD solution A blood  
173 tubes (Becton, Dickinson and Co) and centrifuged for 20 min at 200xg to separate a platelet-rich plasma  
174 (PRP) fraction from erythrocytes. Then, the PRP fraction was further centrifuged for 5 min at 1,100xg. The  
175 resultant platelet-containing pellet was resuspended in 10 mM HEPES (pH 7.4), 134 mM NaCl, 12 mM  
176  $\text{NaHCO}_3$ , 2.9 mM KCl, 0.34 mM  $\text{Na}_2\text{HPO}_4$ , and 1 mM  $\text{MgCl}_2$  (Tyrode's buffer) containing 0.5  $\mu\text{M}$   
177 prostaglandin ( $\text{PGI}_2$ ). Platelets were then washed in  $\text{PGI}_2$ -free Tyrode's buffer, containing 5 mM dextrose  
178 and 0.3% BSA, and counted in a haemocytometer.

#### 179 **Flow cytometry**

180 Washed platelets ( $1.5 \times 10^5$  platelets/ $\mu\text{l}$ ) were maintained in Tyrode's buffer (unactivated) or treated with  
181 30  $\mu\text{M}$  ADP (activated). Both unactivated and activated platelets were incubated for 6 min at room  
182 temperature with either control liposomes (Lipo-C, 50  $\mu\text{g}/\text{ml}$ ) or sulfatide-containing liposomes (Lipo-S,  
183 50  $\mu\text{g}/\text{ml}$ ) in the absence and presence of 50  $\mu\text{M}$  of one of the following peptides: Dab2 SBP, Dab2 SBP  
184 R42A, or Dab2 SBP R42K. Platelets were fixed with 1% formalin in phosphate buffered saline and  
185 incubated with phycoerythrin-labelled anti-CD62P (P-selectin; Biolegend) antibody following  
186 manufacturer's instructions. Antibody-bound platelets were quantified using a FACS Aria flow cytometer.

187

188

189

190



## 191 RESULTS

### 192 Refining the sulfatide-binding site in Dab2 SBP

193 Previous NMR studies showed that the last 20 residues of Dab2 SBP, with a C-terminal polybasic region  
194 49-KYKAKL-54 (**Fig. 1A**), plays a major role in sulfatide interactions (17). Molecular docking was  
195 performed to refine potential residue interactions between a single sulfatide molecule and the model of the  
196 DPC-bound structural conformation of Dab2 SBP (PDB ID: 2LSW) containing vector residues (19-  
197 GPLGS-23) added to the N-terminus to match the experimental peptide used in this work (17). After energy  
198 minimization, the structure of Dab2 SBP was validated and showed favorable energetics and side chain  
199 positioning using Ramachandran plot, ProSA and QMEAN analyses (**Fig. S1**). All nine docking poses hit  
200 a similar Dab2 SBP scaffold and indicated that P32 (backbone), K30 (backbone), and R42 residues form  
201 hydrogen bonds with the OS atoms of the sulfate group in the sulfatide, whereas the acyl chains faced the  
202  $\alpha$ -helix 2 of the peptide (**Fig. 1B-C**). Specifically, the side chain of R42 interacted with the sulfatide head  
203 group forming hydrogen bonds and electrostatic interactions that were approximately 3Å apart (**Fig. 1C**).  
204 Both E33 and Y38 interacted with the galactose moiety (**Fig. 1C**). The conserved 49-KYKAKL-54 region  
205 in Dab2 SBP (**Fig. 1A-C**) was initially suggested to provide an electrostatic environment to attract and  
206 accommodate the negatively charged sulfatide in its Dab2 SBP binding pocket. However, molecular  
207 docking results showed a strong R42 interaction with the sulfate head group, which led to consistent  
208 positioning of the acyl tails of sulfatide towards the  $\alpha$ -helix 2. Initial docking results and fingerprinting  
209 showed that the CH<sub>2</sub> moieties of the K49 and K51 residues interacted with the acyl tails. As K49 and K51  
210 are critical for sulfatide binding (13), the docking results suggest that the four CH<sub>2</sub> moieties in K49 and  
211 K51 contribute to a hydrophobic microenvironment (**Fig. 1D**) in the  $\alpha$ -helix 2 of Dab2 SBP, which aid in  
212 accommodating acyl tails and leading to more energetically favorable positioning of the sulfate head group  
213 towards R42 (**Table S1**). Hydrophobic interactions in  $\alpha$ -helix 2 were also provided by Dab2 SBP residues  
214 Y50, L54, and I55 (**Fig. 1C and Table S1**). Altogether, molecular docking data indicate that  $\alpha$ -helix 1 of

215 Dab2 SBP is involved in contacts with the sulfatide head group, whereas  $\alpha$ -helix 2 favors hydrophobic  
216 contacts with the acyl chains of the lipid.

217

### 218 **Conformational flexibility of Dab2 SBP upon sulfatide binding**

219 In agreement with our previous work (17), addition of DPC-embedded sulfatide to DPC-containing Dab2  
220 SBP has little or no effect on  $^1\text{H}$  and  $^{15}\text{N}$  chemical shifts of residues S24-E37 but perturbs resonances of  
221 most of the residues spanning residues Y38 to D58 (**Fig. S2A**). The heights of HSQC peaks for residues  
222 E33-I56 are considerably lower than those for residues S24 -G31 for both DPC-containing Dab2 SBP with  
223 and without sulfatide-embedded micelles (**Fig. S2B**). Residues S24-G31 do not likely contact DPC micelles  
224 and are highly mobile and solvent-exposed as suggested from paramagnetic relaxation experiments (17).  
225 Residues Y38-I55, on the other hand, contribute to the secondary structure in Dab2 SBP and strongly  
226 interact with DPC micelles (17). Consequently, as observed in **Fig. S2B**, residues E33-I56 may be poorly  
227 observable with solution NMR when Dab2 SBP is bound to either sulfatide-free or -embedded DPC  
228 micelles.

229 We also used NMR to characterize the backbone dynamics of Dab2 SBP in its free-and sulfatide-bound  
230 states (**Fig. 2**). Picosecond to nanosecond backbone dynamics, measured by  $^1\text{H}$ - $^{15}\text{N}$ , heteronuclear  
231 Overhauser effects (NOE) of DPC-associated Dab2 SBP, showed very flexible N- and C-termini and a rigid  
232 structure spanning residues E37-I56; such flexibility was not altered by sulfatides (**Fig. 2A**). Addition of  
233 sulfatides decreased  $R_1$  and increased  $R_2$  of residues T35-I56. This suggests that the correlation time of the  
234 motions causing relaxation is greater than the molecular correlation time at the  $R_1$  maximum ( $\sim 5 \times 10^{-8}$  s) of  
235 a  $R_1$  versus the molecular correlation time plot (30). The relaxation data also indicate that sulfatide has little  
236 or no effect on the motions of residues S24-G31 but shifts the spectral density of residues T35-I56 to a  
237 lower frequency. This could be due to sulfatide binding to residues T35-I56, consistent with the data from  
238 both molecular docking (**Fig. 1B-C**) and HSQC titrations of the peptide with the lipid (**Fig. S2**), or a  
239 sulfatide-induced increase in DPC micelle size or both.

240 ***In silico* and lipid-binding assays of Dab2 SBP mutants confirm critical sulfatide-binding residues**

241 From sulfatide docking studies on wild-type Dab2 SBP, sulfatide docked 8 out of 9 poses clustered near  
242 R42 with the sulfate groups being within 5.6 Å between the furthest atoms of the sulfate group in each pose  
243 and 1 out of 9 poses residing within 7.4 Å of the cluster group. In addition, HSQC titrations showed that  
244 sulfatide markedly perturbed R42 (**Fig. S2A**), consistent with previous observations (17). Further molecular  
245 docking experiments were performed to confirm the influence of R42 for sulfatide binding. Replacement  
246 of R42 to alanine reduced close contacts of Dab2 SBP for sulfatide, as concluded from the analysis of nine  
247 independent sulfatide poses on the mutated peptide (**Fig. 3A**, **Fig. S3**, and **Fig. S8**). Dab2 SBP R42A  
248 increased the distance for sulfate head group-A42 interactions to greater than 5.0 Å compared to the wild-  
249 type peptide (3.1 Å). To adjust to the loss of R42 in Dab2 SBP R42A, the sulfate head group sought to  
250 hydrogen bond with E33 and T35. Interaction fingerprint analysis of Dab2 SBP R42A showed fewer overall  
251 interactions (**Fig. 3A**), specifically a loss of aromatic and polar interactions with sulfatide compared to the  
252 wild-type peptide (**Table S1**). Docking results also revealed that a mutation of R42 to lysine (R42K)  
253 reduced the number of Dab2 SBP contacts with sulfatide (**Fig. 3B**) and exhibited less specific docking  
254 clusters on the predicted sulfatide-binding site in Dab2 SBP (**Fig. S8**), but more closely resembled wild-  
255 type Dab2 SBP interactions than R42A. Further analysis indicated that R42K had less aromatic, charged,  
256 hydrophobic, and polar interactions while having more hydrogen bond interactions compared to Dab2 SBP  
257 (**Table S1**). Although Dab2 SBP R42K retains the charged interaction that R42 displayed in Dab2 SBP, the  
258 interaction distance between the side chain of K42 and the sulfate head group increased to 3.9 Å. This result  
259 indicates that not only the charged but also the stereochemistry of an arginine residue is required for proper  
260 sulfatide docking in Dab2 SBP. Similarly, replacement of Y38 to alanine led Dab2 SBP to have less polar,  
261 hydrophobic, and charged interactions with sulfatide while having more backbone and hydrogen bond  
262 interactions (**Table S1**). Dab2 SBP Y38A increased the interaction distance to 5.0 Å with the sulfate head  
263 group (**Fig. 3C**), confirming that Y38 plays an important role in sulfatide docking, while not necessarily  
264 interacting with the sulfate group itself.

265

266 Molecular docking of sulfatide in Dab2 SBP predicted lipid acyl chain interactions with residues located in  
267  $\alpha$ -helix 2 (**Fig. 3D-E**). Combination mutations at K49, K51, and K53 stabilized the R42 and sulfate head  
268 group interaction but influenced acyl tail positioning (**Fig. 3D** and **Fig. S6**). This triple mutation in Dab2  
269 SBP showed the same interaction distance as the wild-type peptide (3.1 Å) with tight sulfate head clustering,  
270 as all 9 poses were clustered within 5.5 Å of each other and interacted with R42 compared to 8 out of 9  
271 poses in the wild-type form (**Fig. S8**). However, Dab2 SBP K49A/K51A/K53A had less polar, aromatic,  
272 and charged interactions while having more backbone and hydrogen bond interactions (**Table S1**). The  
273 surface rendering of Dab2 SBP K49A/K51A/K53A indicated an exposed hydrophobic area that is less  
274 delimited than the wild type Dab2 SBP (**Fig. 3F**), potentially causing a loss of affinity for sulfatide. Thus,  
275 these results support the observed environment of Dab2 SBP, generated by residues R42, Y38, K49, K51,  
276 and K53, for sulfatide binding. Replacement of Y50 by alanine in the peptide exhibited less total charged  
277 and hydrophobic interactions with sulfatide, increasing the sulfate head group distance to R42 to 4.7 Å with  
278 a concomitant increment in polar, backbone, and hydrogen bond interactions (**Fig. 3E**, **Fig. S7**, and **Table**  
279 **S1**).

280

281 To experimentally assess whether the mutations in Dab2 SBP alter sulfatide binding, recombinant Dab2  
282 SBP, and the mutants identified by docking studies, were fused to GST and employed to screen for sulfatide  
283 binding using the lipid-protein overlay assay. Although this assay does not mirror the physiological  
284 organization of sulfatides in biological membranes, it is still useful to obtain a first screening for the binding  
285 of the Dab2 SBP mutants to the sphingolipid. As expected, Dab2 SBP bound sulfatides and closely reached  
286 saturation at 800 pmoles of lipid (**Fig. 4A-B**). Alanine mutations at residues upstream of  $\alpha$ -helix 1, such as  
287 P32 and E33 (**Fig. 1A**), reduced the peptide's sulfatide binding, whereas mutation at R42 abolished it (**Fig.**  
288 **4**). The poor binding capacity to sulfatides displayed by Dab2 SBP R42A is not due to a disruption of  $\alpha$ -  
289 helix 1 as it remains as folded as the wild-type peptide, as indicated by their circular dichroism spectra (**Fig.**

290 **S9**). Consistent with the molecular docking studies, R42 to lysine reduced sulfatide binding whereas alanine  
291 mutations on residues outside of the predicted binding pocket, such as E37 and E46, did not alter lipid  
292 binding (**Fig. 4**). Unexpectedly, alanine mutation of Dab2 SBP at K44, which did not alter the secondary  
293 structure of the peptide (**Fig. S9**), markedly affected sulfatide binding (**Fig. 4**). Mutagenesis at the second  
294 helix, where sulfatide acyl chains may interact, showed that Y50 is not critical for sulfatide binding, but a  
295 triple alanine mutation at residues K49, K51, and K53 markedly reduced it (**Fig. 4**) without affecting the  
296 secondary structure of the peptide (**Fig. S9**). The role of these basic residues in sulfatide-binding is in  
297 agreement with mutagenesis and liposome-binding studies we obtained previously using Dab2 N-PTB (13).

298

299 Next, taken the molecular docking and LPOA results together, we focused on the novel role of the Dab2  
300 SBP residues Y38 and R42 for binding to sulfatides using sulfatide-enriched liposomes of 100 nm in  
301 diameter and followed their interactions using SPR. In agreement with previous observations (17), SPR  
302 data showed that Dab2 SBP bound sulfatide liposomes with a  $K_D$  of  $\sim 35 \mu\text{M}$  and the association displayed  
303 saturation of binding (**Fig. 5A and D**). Alanine mutation at Y38 exhibited a decrease of sulfatide liposome  
304 binding with a  $K_D$  of  $\sim 70 \mu\text{M}$  (**Fig. 5B and D**). Binding of Dab2 SBP R42A to sulfatide liposomes was  
305 weaker, with an estimated  $K_D$  higher than  $100 \mu\text{M}$  (**Fig. 5C-D**). Thus, in addition of the role of the  $\alpha$ -helix-  
306 2 in sulfatide binding, our results show that R42 and Y38, the latter in a lesser extent, are relevant for the  
307 association of Dab2 SBP with sulfatide-embedded lipid bilayers.

308

### 309 **Dab2 SBP depends on R42 to reduce sulfatide-mediated P-selectin expression**

310 P-selectin is a cell surface pro-aggregatory protein found in platelets and endothelial cells. This protein is  
311 stored in  $\alpha$ -granules and is quickly released to the platelet surface in response to a wide range of  
312 thrombogenic stimuli (31). P-selectin promotes platelet aggregation in a sulfatide-dependent manner (32).  
313 To establish whether Dab2 SBP can modulate P-selectin pro-aggregatory activity, we evaluated the cell

314 surface expression of P-selectin. Washed platelets were previously activated with ADP, which represents a  
315 critical step for sulfatide-mediated platelet activation (32). Consistent with previous observations (15),  
316 incubation of activated platelets with sulfatide-containing liposomes led to an increase in the median  
317 fluorescence of the anti-P-selectin antibody bound to the platelet surface (**Fig. 6A**), indicating that sulfatides  
318 promote P-selectin accumulation at the platelet surface. Pre-incubation of sulfatide liposomes with Dab2  
319 SBP significantly reduced the presence of P-selectin at the platelet surface (**Fig. 6A**), suggesting that the  
320 peptide competes with P-selectin for sulfatide binding. Replacement of R42 with lysine or alanine  
321 significantly impaired the Dab2 SBP inhibitory activity (**Fig. 6A**). Representative histograms showing the  
322 distribution of the baseline population of platelets is indicated in **Fig. 6B**. As expected, ADP induces a  
323 minor right shift, which is indicative of platelet activation (**Fig. 6B**, inset). In contrast to sulfatide-free  
324 liposomes, the majority of the platelet population become further activated by the presence of sulfatide  
325 liposomes (**Fig. 6B**, inset). In contrast to the presence of either R42A or R42K, the addition of Dab2 SBP  
326 led to a shift to the left of the median fluorescence (**Fig. 6B**). Together, our results indicate that Dab2 SBP  
327 has the potential to inhibit P-selectin function, with R42 playing a critical role.

## 328 **DISCUSSION**

329 In this study, we structurally and functionally characterized the sulfatide binding region of Dab2,  
330 represented by SBP (human Dab2 residues 24-58). Our molecular docking studies suggest that residues  
331 upstream and on the first  $\alpha$ -helix of Dab2 SBP interact with the sulfatide head group, whereas the second  
332  $\alpha$ -helix provided recognition of the sphingolipid acyl chains. To establish the structural basis of Dab2  
333 interaction with sulfatides, we designed a series of Dab2 SBP mutants, which were tested for *in vitro*  
334 sulfatide binding. In comparison to our previous report using Dab2 N-PTB (13), the N-terminal 25-  
335 KKEKKK-30 region in Dab2 did not exhibit a role in sulfatide binding as observed from our molecular  
336 docking and NMR relaxation results.

337 Our current results suggest that the Dab2 SBP basic residue, R42, is critical for association to the negatively  
338 charged sulfatide. *In silico* results closely matched our experimental results, highlighting the ability of  
339 docking to predict key residues for binding sulfatide in Dab2 SBP. Replacement of R42 with lysine reduced  
340 sulfatide binding *in vitro* and significantly affected the function of the peptide for targeting P-selectin  
341 surface expression in platelets. This result implies that not only the positive charge, but also the  
342 stereochemistry of the side chain, is required for sulfatide interactions. In addition, other charged and  
343 aromatic Dab2 SBP residues (*i.e.*, E33, Y38, K44) were relevant for lipid interactions. Previous results  
344 suggested that the last 20 residues of Dab2 SBP, containing residues Y38-L40 and R42 as well as the C-  
345 terminal 49-KYKAKL-54 motif are involved in sulfatide interactions (17). Mutagenesis analysis of the C-  
346 terminal 49-KYKAKL-54 motif (**Fig. 4**) confirmed its role in sulfatide binding. By docking a sulfatide to  
347 Dab2 SBP, we found that the C-terminal polybasic motif, located in  $\alpha$ -helix 2, is likely required for acyl  
348 chain hydrophobic interactions rather than binding to the sphingolipid head group. Lysine residues are  
349 considered to exhibit a dual role in lipid contacts, that is, by promoting electrostatic interactions with  
350 negatively charged lipids and/or by employing their flexible hydrocarbon spacers for hydrophobic  
351 interactions with membrane lipids (33). Indeed, we observe a hydrophobic patch in the wild type Dab2 SBP  
352 structure (**Fig. 1D**) that is shaped by K49, K51, and K53. The suggested roles of the  $\alpha$ -helices in sulfatide  
353 docking are in agreement with the doxyl stearic acid-based paramagnetic quenching NMR experiments  
354 using sulfatide-embedded DPC micelles (17), which demonstrate that the first Dab2 SBP  $\alpha$ -helix is less  
355 quenched than the second one. Thus, this suggests that the first  $\alpha$ -helix is closer to the micellar surface,  
356 whereas the second  $\alpha$ -helix is oriented towards the micelle core.

357 Very few protein-sulfatide complexes have been structurally characterized. The interaction of the cluster of  
358 differentiation 1a (CD1a) with sulfatide involves hydrogen bonds to its 3' sulfate group with R76 and E154  
359 and the galactose moiety with R76 and S77, whereas the sulfatide fatty acid chains display van der Waals  
360 interactions mostly with hydrophobic residues (34). Interestingly, a basic residue (H38) plays a role in  
361 accommodating one of the alkyl chains in the binding pocket of CD1a.

362 Sphingolipid-binding domains, such as those described in viral, bacterial, and mammalian proteins (35-37),  
363 exhibit a consensus helix-turn-helix fold with an aromatic residue, predominantly, being solvent-exposed,  
364 and either a G or P residue contributing to the turn between the  $\alpha$ -helices and several positively charged  
365 residues (38). Intriguingly, a consensus sphingolipid-binding motif has been identified in  $\alpha$ -synuclein (39),  
366 which shares several features with Dab2 SBP (**Fig. 6C**). Molecular dynamic simulations show that  $\alpha$ -  
367 synuclein simultaneously interacts with two molecules of the glycosphingolipid  
368 monosialodihexosylganglioside (GM3), with Y39 representing the most critical sphingolipid-binding  
369 residue (39). Of note, it is currently unknown whether Dab2 can bind two sulfatide molecules  
370 simultaneously. The  $\alpha$ -synuclein protein also binds sulfatides, but GM3 represents its preferred ligand.  
371 Indeed, we showed that alanine mutation in the equivalent conserved tyrosine residue in Dab2, Y38, reduces  
372 the affinity for sulfatide binding by  $\sim$ 50%. In the  $\alpha$ -synuclein membrane model interaction, it is proposed  
373 that Y39 is located at the interface between the polar and nonpolar regions of the sphingolipid, mediating  
374 the protein insertion into the membrane (39). Supportive of this observation, Dab2 Y38 undergoes 30-50%  
375 reduction in its resonance intensity in micellar paramagnetic NMR experiments (17). Accordingly, we  
376 observed that Dab2 SBP Y38 exhibited minor dynamic changes when the peptide was in contact with  
377 sulfatide-embedded DPC micelles. A basic residue (K34) located upstream of Y39, also displays a major  
378 role for  $\alpha$ -synuclein interactions with GM3 (39). However, Dab2 SBP K34 did not exhibit an important  
379 role in sulfatide binding as concluded from molecular docking and NMR assays. In contrast to GM3,  
380 sulfatides are negatively charged. Thus, it is possible that  $\alpha$ -synuclein K43 may play a similar role to that  
381 observed for Dab2 R42 in sulfatide interactions. Considering that R42K mutation in Dab2 SBP reduced the  
382 activity of the peptide but did not abolish it, the presence of K43, instead of R43, might also reduce the  
383 preference of  $\alpha$ -synuclein for sulfatides.

384 Sulfatides are found in discrete patches on activated spread platelet membranes, reminiscent of lipid rafts.  
385 Platelet surface expression of the sulfatide-binding pro-aggregatory protein P-selectin increases the stability  
386 of platelet aggregation (32). Accordingly, Dab2 modulates the extent of platelet aggregation by targeting



387 P-selectin function. The association of Dab2 to sulfatides impairs P-selectin-sulfatide interactions, thereby  
388 blocking homotypical and heterotypical cell-cell interactions (15). Upon platelet activation, Dab2 is  
389 transiently secreted from  $\alpha$ -granules to the cell surface (13). Upon sulfatide binding, Dab2 likely undergoes  
390 a conformational change (40), a state in which the protein is more tolerant to thrombin proteolysis (13). It  
391 has been suggested that, once secreted, Dab2 modulates the extent of platelet aggregation by two  
392 independent mechanisms (1). First, Dab2 downregulates the integrin receptor activity by interfering with  
393 its interaction with fibrinogen. Second, extracellular Dab2 blocks platelet-platelet P-selectin-mediated  
394 sulfatide-dependent interactions. Other sulfatide-binding proteins have also been reported to be exported  
395 out of the cell for extracellular interactions with sulfatides. For example, the mesencephalic astrocyte-  
396 derived neurotrophic factor (MANF) is an endoplasmic reticulum protein that is secreted under stress-  
397 related stimuli (41). Binding of secreted MANF to sulfatides, through its  $\alpha$ -helical saposin-like domain,  
398 provides MANF cellular uptake and alleviates stress responses driven by the endoplasmic reticulum (42).

399 In conclusion, our results indicate how sulfatides interact with Dab2 SBP and identify the critical binding  
400 residues. Our data is in line with what was earlier defined as the minimal  $\alpha$ -helical-turn- $\alpha$ -helical unit for  
401 sphingolipid binding. Furthermore, in the case of Dab2, R42 mediating the recognition of negatively  
402 charged sulfatide headgroup, and the  $\alpha$ -helical lysine residues providing an adequate hydrophobic  
403 environment through their flexible hydrocarbon spacers.

404

#### 405 **Acknowledgements**

406 We thank Dr. Janet Webster for critical reading of the manuscript. This project was supported by the  
407 Virginia Academy of Science, the Institute for Critical Technology and Applied Science (ICTAS) at  
408 Virginia Tech, and the 4-VA Collaborative Research Program (to D.G.S.C.) and the National Science  
409 Foundation (MCB-1517298) (to C.V.F). W.S. was supported by an ICTAS pre-doctoral fellowship.

410

411 **REFERENCES**

- 412 1. Finkielstein, C. V., and D. G. Capelluto. 2016. Disabled-2: A modular scaffold protein with  
413 multifaceted functions in signaling. *Bioessays* **38 Suppl 1**: S45-55.
- 414 2. Howell, B. W., F. B. Gertler, and J. A. Cooper. 1997. Mouse disabled (mDab1): a Src binding  
415 protein implicated in neuronal development. *EMBO J* **16**: 121-132.
- 416 3. Xu, X. X., W. Yang, S. Jackowski, and C. O. Rock. 1995. Cloning of a novel phosphoprotein  
417 regulated by colony-stimulating factor 1 shares a domain with the Drosophila disabled gene product. *J Biol*  
418 *Chem* **270**: 14184-14191.
- 419 4. Sheng, Z., W. Sun, E. Smith, C. Cohen, Z. Sheng, and X. X. Xu. 2000. Restoration of positioning  
420 control following Disabled-2 expression in ovarian and breast tumor cells. *Oncogene* **19**: 4847-4854.
- 421 5. Zhou, J., J. Scholes, and J. T. Hsieh. 2003. Characterization of a novel negative regulator (DOC-  
422 2/DAB2) of c-Src in normal prostatic epithelium and cancer. *J Biol Chem* **278**: 6936-6941.
- 423 6. Karam, J. A., S. F. Shariat, H. Y. Huang, R. C. Pong, R. Ashfaq, E. Shapiro, Y. Lotan, A. I.  
424 Sagalowsky, X. R. Wu, and J. T. Hsieh. 2007. Decreased DOC-2/DAB2 expression in urothelial carcinoma  
425 of the bladder. *Clin Cancer Res* **13**: 4400-4406.
- 426 7. Kleeff, J., Y. Huang, S. C. Mok, A. Zimmermann, H. Friess, and M. W. Buchler. 2002. Down-  
427 regulation of DOC-2 in colorectal cancer points to its role as a tumor suppressor in this malignancy. *Dis*  
428 *Colon Rectum* **45**: 1242-1248.
- 429 8. Fulop, V., C. V. Colitti, D. Genest, R. S. Berkowitz, G. K. Yiu, S. W. Ng, J. Szepesi, and S. C.  
430 Mok. 1998. DOC-2/hDab2, a candidate tumor suppressor gene involved in the development of gestational  
431 trophoblastic diseases. *Oncogene* **17**: 419-424.
- 432 9. Huang, C. L., J. C. Cheng, C. H. Liao, A. Stern, J. T. Hsieh, C. H. Wang, H. L. Hsu, and C. P.  
433 Tseng. 2004. Disabled-2 is a negative regulator of integrin alpha(IIb)beta(3)-mediated fibrinogen adhesion  
434 and cell signaling. *J Biol Chem* **279**: 42279-42289.

- 435 10. Rivera, J., M. L. Lozano, L. Navarro-Nunez, and V. Vicente. 2009. Platelet receptors and signaling  
436 in the dynamics of thrombus formation. *Haematologica* **94**: 700-711.
- 437 11. Stefanini, L., and W. Bergmeier. 2018. Negative regulators of platelet activation and adhesion. *J*  
438 *Thromb Haemost* **16**: 220-230.
- 439 12. Huang, C., J. Cheng, A. Stern, J. Hsieh, C. Liao, and C. Tseng. 2006. Disabled-2 is a novel alphaIIb-  
440 integrin-binding protein that negatively regulates platelet-fibrinogen interactions and platelet aggregation.  
441 *J Cell Sci* **119**: 4420-4430.
- 442 13. Drahos, K., J. Welsh, C. V. Finkielstein, and D. G. Capelluto. 2009. Sulfatides partition disabled-  
443 2 in response to platelet activation. *PLoS One* **4**: e8007.
- 444 14. Xiao, S., C. V. Finkielstein, and D. G. Capelluto. 2013. The enigmatic role of sulfatides: new  
445 insights into cellular functions and mechanisms of protein recognition. *Adv Exp Med Biol* **991**: 27-40.
- 446 15. Welsh, J., J. Charonko, A. Salmanzadeh, K. Drahos, H. Shafiee, M. Stremmler, R. Davalos, D. G.  
447 Capelluto, P. Vlachos, and C. V. Finkielstein. 2011. Disabled-2 modulates homotypic and heterotypic  
448 platelet interactions by binding to sulfatides. *Br J Haematol* **154**: 122-133.
- 449 16. Merten, M., and P. Thiagarajan. 2000. P-selectin expression on platelets determines size and  
450 stability of platelet aggregates. *Circulation* **102**: 1931-1936.
- 451 17. Xiao, S., J. J. Charonko, X. Fu, A. Salmanzadeh, R. V. Davalos, P. P. Vlachos, C. V. Finkielstein,  
452 and D. G. Capelluto. 2012. Structure, sulfatide binding properties, and inhibition of platelet aggregation by  
453 a Disabled-2 protein-derived peptide. *J Biol Chem* **287**: 37691-37702.
- 454 18. Xiao, S., X. Zhao, C. V. Finkielstein, and D. G. Capelluto. 2014. A rapid procedure to isolate  
455 isotopically labeled peptides for NMR studies: application to the Disabled-2 sulfatide-binding motif. *J Pept*  
456 *Sci* **20**: 216-222.
- 457 19. Schrödinger Release 2018-3: Maestro, S., LLC, New York, NY, . 2018.
- 458 20. Harder, E., W. Damm, J. Maple, C. Wu, M. Reboul, J. Y. Xiang, L. Wang, D. Lupyan, M. K.  
459 Dahlgren, J. L. Knight, J. W. Kaus, D. S. Cerutti, G. Krilov, W. L. Jorgensen, R. Abel, and R. A. Friesner.

- 460 2016. OPLS3: A Force Field Providing Broad Coverage of Drug-like Small Molecules and Proteins. *J*  
461 *Chem Theory Comput* **12**: 281-296.
- 462 21. Lovell, S. C., I. W. Davis, W. B. Arendall, 3rd, P. I. de Bakker, J. M. Word, M. G. Prisant, J. S.  
463 Richardson, and D. C. Richardson. 2003. Structure validation by Calpha geometry: phi,psi and Cbeta  
464 deviation. *Proteins* **50**: 437-450.
- 465 22. Waterhouse, A., M. Bertoni, S. Bienert, G. Studer, G. Tauriello, R. Gumienny, F. T. Heer, T. A. P.  
466 de Beer, C. Rempfer, L. Bordoli, R. Lepore, and T. Schwede. 2018. SWISS-MODEL: homology modelling  
467 of protein structures and complexes. *Nucleic Acids Res* **46**: W296-W303.
- 468 23. Benkert, P., M. Biasini, and T. Schwede. 2011. Toward the estimation of the absolute quality of  
469 individual protein structure models. *Bioinformatics* **27**: 343-350.
- 470 24. Wiederstein, M., and M. J. Sippl. 2007. ProSA-web: interactive web service for the recognition of  
471 errors in three-dimensional structures of proteins. *Nucleic Acids Res* **35**: W407-410.
- 472 25. Sippl, M. J. 1993. Recognition of errors in three-dimensional structures of proteins. *Proteins* **17**:  
473 355-362.
- 474 26. Pettersen, E. F., T. D. Goddard, C. C. Huang, G. S. Couch, D. M. Greenblatt, E. C. Meng, and T.  
475 E. Ferrin. 2004. UCSF Chimera--a visualization system for exploratory research and analysis. *J Comput*  
476 *Chem* **25**: 1605-1612.
- 477 27. Morris, G. M., R. Huey, W. Lindstrom, M. F. Sanner, R. K. Belew, D. S. Goodsell, and A. J. Olson.  
478 2009. AutoDock4 and AutoDockTools4: Automated docking with selective receptor flexibility. *J Comput*  
479 *Chem* **30**: 2785-2791.
- 480 28. Trott, O., and A. J. Olson. 2010. AutoDock Vina: improving the speed and accuracy of docking  
481 with a new scoring function, efficient optimization, and multithreading. *J Comput Chem* **31**: 455-461.
- 482 29. Schrodinger, L., The PyMOL Molecular Graphics System, Version 1.8. . 2015.
- 483 30. Kay, L. E., D. A. Torchia, and A. Bax. 1989. Backbone dynamics of proteins as studied by 15N  
484 inverse detected heteronuclear NMR spectroscopy: application to staphylococcal nuclease. *Biochemistry*  
485 **28**: 8972-8979.

- 486 31. Furie, B., B. C. Furie, and R. Flaumenhaft. 2001. A journey with platelet P-selectin: the molecular  
487 basis of granule secretion, signalling and cell adhesion. *Thromb Haemost* **86**: 214-221.
- 488 32. Merten, M., C. Beythien, K. Gutensohn, P. Kuhl, T. Meinertz, and P. Thiagarajan. 2005.  
489 Sulfatides activate platelets through P-selectin and enhance platelet and platelet-leukocyte aggregation.  
490 *Arterioscler Thromb Vasc Biol* **25**: 258-263.
- 491 33. Hoernke, M., C. Schwieger, A. Kerth, and A. Blume. 2012. Binding of cationic pentapeptides with  
492 modified side chain lengths to negatively charged lipid membranes: Complex interplay of electrostatic and  
493 hydrophobic interactions. *Biochim Biophys Acta* **1818**: 1663-1672.
- 494 34. Zajonc, D. M., M. A. Elsliger, L. Teyton, and I. A. Wilson. 2003. Crystal structure of CD1a in  
495 complex with a sulfatide self antigen at a resolution of 2.15 Å. *Nat Immunol* **4**: 808-815.
- 496 35. Delezay, O., D. Hammache, J. Fantini, and N. Yahi. 1996. SPC3, a V3 loop-derived synthetic  
497 peptide inhibitor of HIV-1 infection, binds to cell surface glycosphingolipids. *Biochemistry* **35**: 15663-  
498 15671.
- 499 36. Fantini, J., N. Garmy, and N. Yahi. 2006. Prediction of glycolipid-binding domains from the amino  
500 acid sequence of lipid raft-associated proteins: application to HpaA, a protein involved in the adhesion of  
501 *Helicobacter pylori* to gastrointestinal cells. *Biochemistry* **45**: 10957-10962.
- 502 37. Taieb, N., M. Maresca, X. J. Guo, N. Garmy, J. Fantini, and N. Yahi. 2009. The first extracellular  
503 domain of the tumour stem cell marker CD133 contains an antigenic ganglioside-binding motif. *Cancer*  
504 *Lett* **278**: 164-173.
- 505 38. Fantini, J. 2003. How sphingolipids bind and shape proteins: molecular basis of lipid-protein  
506 interactions in lipid shells, rafts and related biomembrane domains. *Cell Mol Life Sci* **60**: 1027-1032.
- 507 39. Fantini, J., and N. Yahi. 2011. Molecular basis for the glycosphingolipid-binding specificity of  
508 alpha-synuclein: key role of tyrosine 39 in membrane insertion. *J Mol Biol* **408**: 654-669.
- 509 40. Alajlouni, R., K. Drahos, C. V. Finkielstein, and D. G. Capelluto. 2011. Lipid-mediated membrane  
510 binding properties of Disabled-2. *Biochim Biophys Acta* **1808**: 2734-2744.

511 41. Liu, H., X. Tang, and L. Gong. 2015. Mesencephalic astrocyte-derived neurotrophic factor and  
512 cerebral dopamine neurotrophic factor: New endoplasmic reticulum stress response proteins. *Eur J*  
513 *Pharmacol* **750**: 118-122.

514 42. Bai, M., R. Vozdek, A. Hnizda, C. Jiang, B. Wang, L. Kuchar, T. Li, Y. Zhang, C. Wood, L. Feng,  
515 Y. Dang, and D. K. Ma. 2018. Conserved roles of *C. elegans* and human MANFs in sulfatide binding and  
516 cytoprotection. *Nat Commun* **9**: 897.

517

518

519

520

521

522

523

524

525

526

527

528

529

530

531

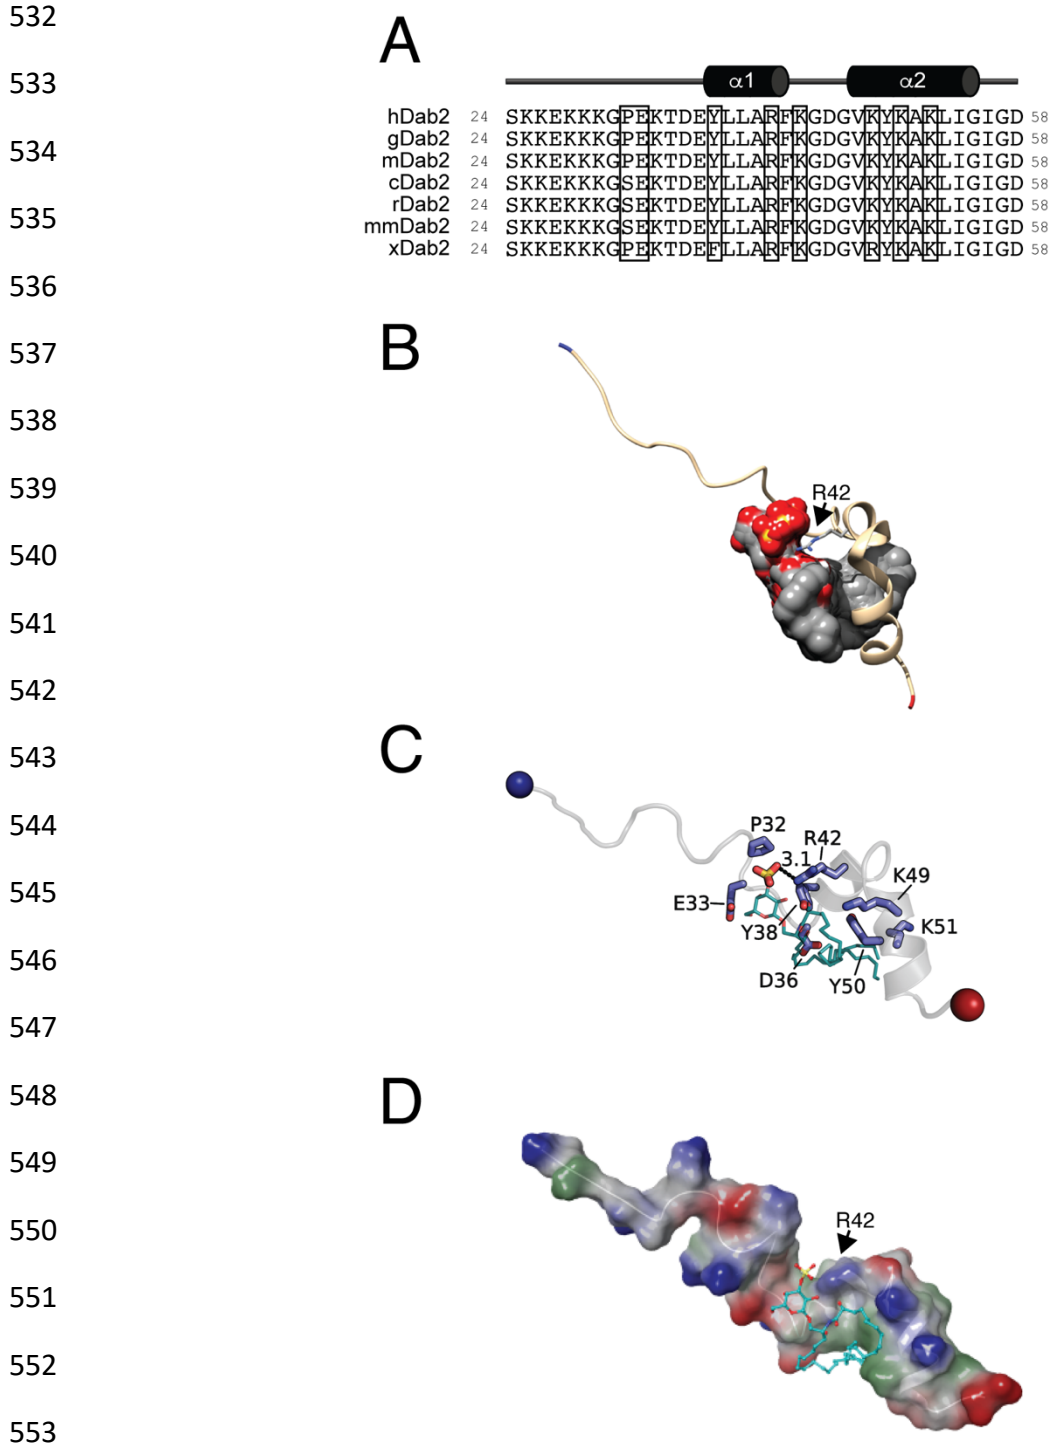

554 **Figure 1. Sulfatide docking onto Dab2 SBP.** (A) Sequences of the closest homologues of Dab2 proteins  
 555 corresponding to the SBP region. hDab2, *Homo sapiens* Dab2; gDab2, *Gorilla gorilla* Dab2; mDab2,  
 556 *Mandrillus leucopheous* Dab2; cDab2, *Canis lupus familiaris* Dab2; rDab2, *Rattus norvegicus* Dab2;  
 557 mmDab2, *Mus musculus* Dab2; xDab2, *Xenopus laevis* Dab2. Residues implicated in sulfatide binding, as

558 determined from this work, are boxed. **(B)** Overlaid poses of sulfatide docked to Dab2 SBP. Dab2 SBP is  
559 rendered as a cartoon and is colored tan with the N-terminus colored blue and the C-terminus is colored  
560 red. R42 is shown as a stick that is colored gray and by atom type. The nine poses produced by AutoDock  
561 Vina are shown as a gray surface and by atom type. The side chain of R42 is colored in blue stick. Sulfatides  
562 (cyan) are shown as sticks and colored by element. **(C)** Key sulfatide-binding residues of Dab2. Dab2 SBP  
563 is rendered as a cartoon colored transparent gray with the N- and C-terminus shown as blue and red spheres,  
564 respectively. Key residues are shown as blue sticks and labelled. **(D)** Surface representation of sulfatide-  
565 bound Dab2 SBP showing the hydrophobic (green), positively charged (blue), and negatively charged (red)  
566 surface regions. Sulfatide backbone is represented in stick colored with carbon as cyan, sulfate as yellow,  
567 and oxygen as red. Surface potential was calculated using Schrodinger Maestro.

568

569

570

571

572

573

574

575

576

577



578  
579  
580  
581  
582  
583  
584  
585  
586  
587  
588  
589  
590  
591  
592  
593  
594  
595  
596  
597  
598  
599  
600  
601  
602

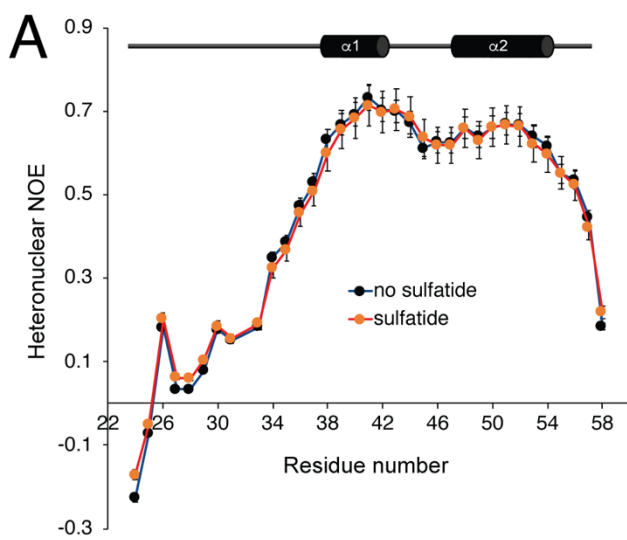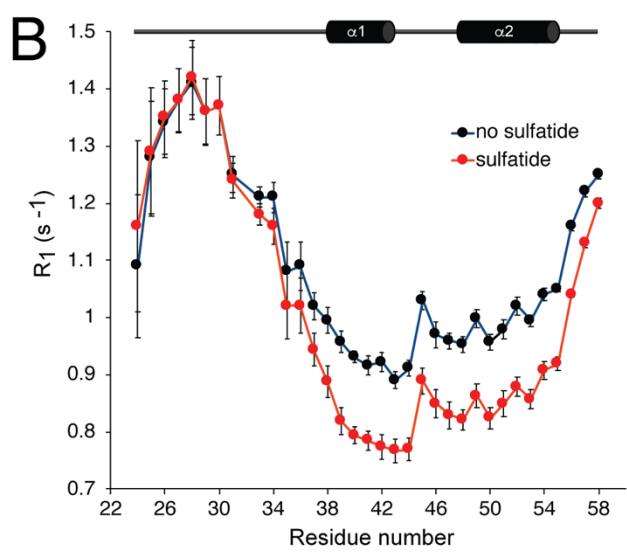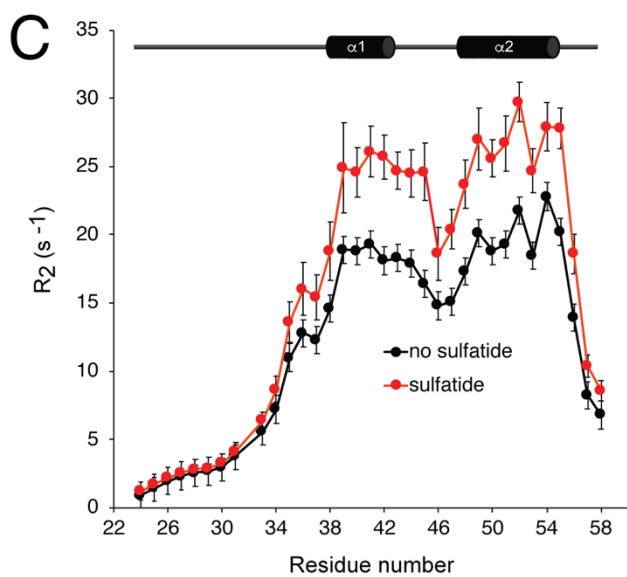

603 **Figure 2. Dab2 SBP dynamics characterized by NMR relaxation measurements.**  $^1\text{H}$ - $^{15}\text{N}$  NOE ratio  
604 (A), longitudinal relaxation rates,  $R_1$  (B), and transversal relaxation rates,  $R_2$  (C) of DPC-embedded Dab2  
605 SBP in the absence (black) or presence (red) of 8-fold DPC-embedded sulfatides. The secondary structure  
606 of Dab2 SBP is depicted at the top of each panel.

607

608

609

610

611

612

613

614

615

616

617

618

619

620

621

622

623

624

625

626

627

628

629  
630  
631

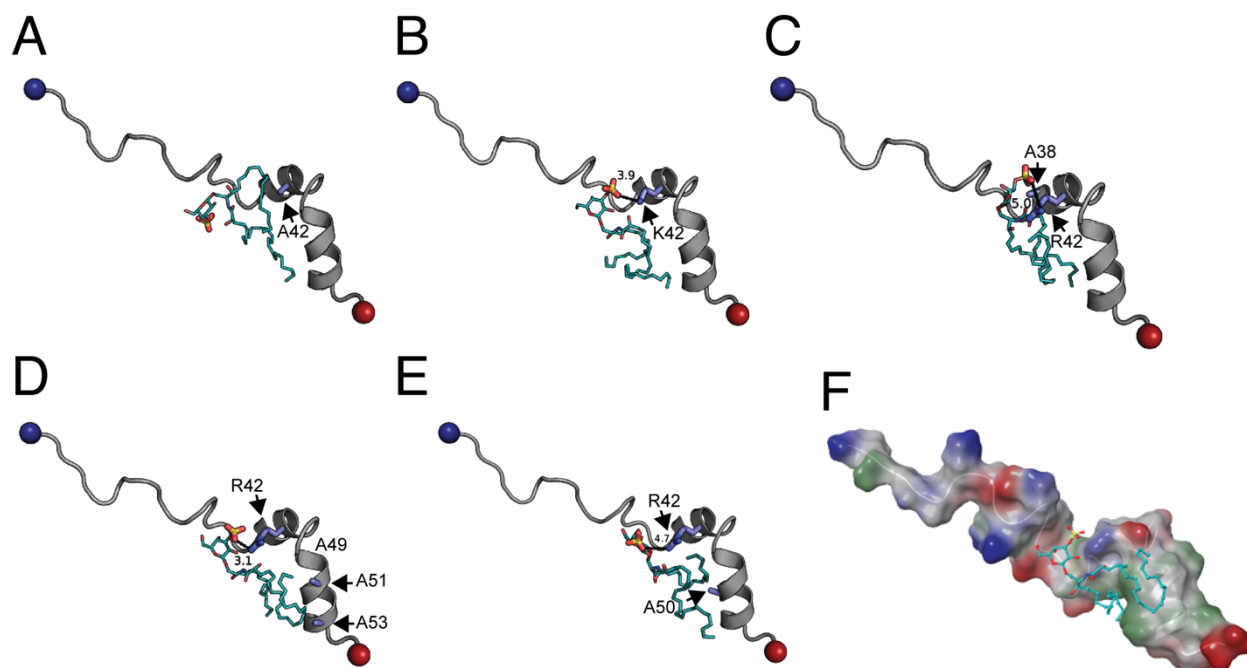

632  
633  
634  
635

636 **Figure 3. Identification of Dab2 SBP critical residues for sulfatide binding using molecular docking**

637 (A-E) Lowest energy pose of sulfatide docked to Dab2 SBP R42A (A), Dab2 SBP R42K (B), Dab2 SBP

638 Y38A (C), Dab2 SBP K49A/K51A/K53A (D), and Dab2 SBP Y50A (E). In all cases, key residues are

639 colored in blue. Sulfatides (cyan) are shown as sticks and colored by element. (F) Surface representation

640 of sulfatide-bound Dab2 SBP K49A/K51A/K53A showing the hydrophobic (green), positively charged

641 (blue), and negatively charged (red) regions. Sulfatide backbone is represented in stick colored with carbon

642 as cyan, sulfate as yellow and oxygen as red. Surface potential was calculated using Schrodinger Maestro.

643

644

**A**

645

646

647

648

649

650

651

652

653

654

655

656

657

658

659

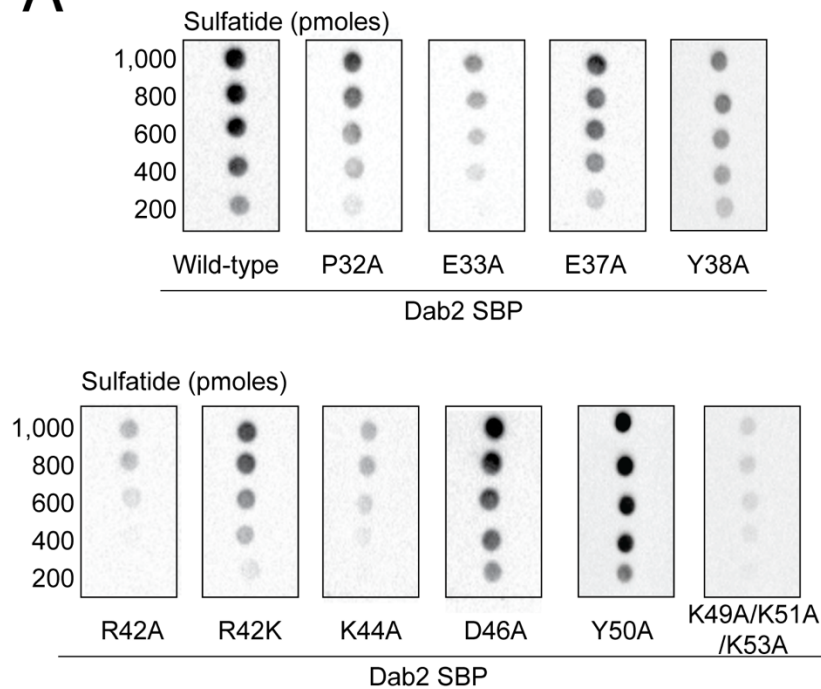

**B**

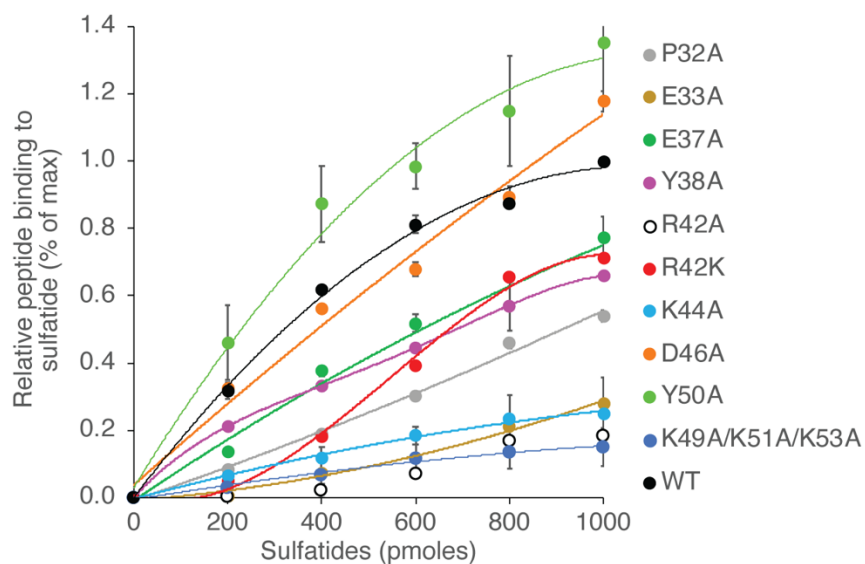

660 **Figure 4. Characterization of sulfatide binding to Dab2 SBP *in vitro*.** (A) Lipid-protein overlay assay

661 displaying the binding of GST fusion Dab2 SBP and the indicated mutants to sulfatides immobilized on

662 nitrocellulose. (B) Quantification of the binding of the GST fusion peptides to sulfatides.

663

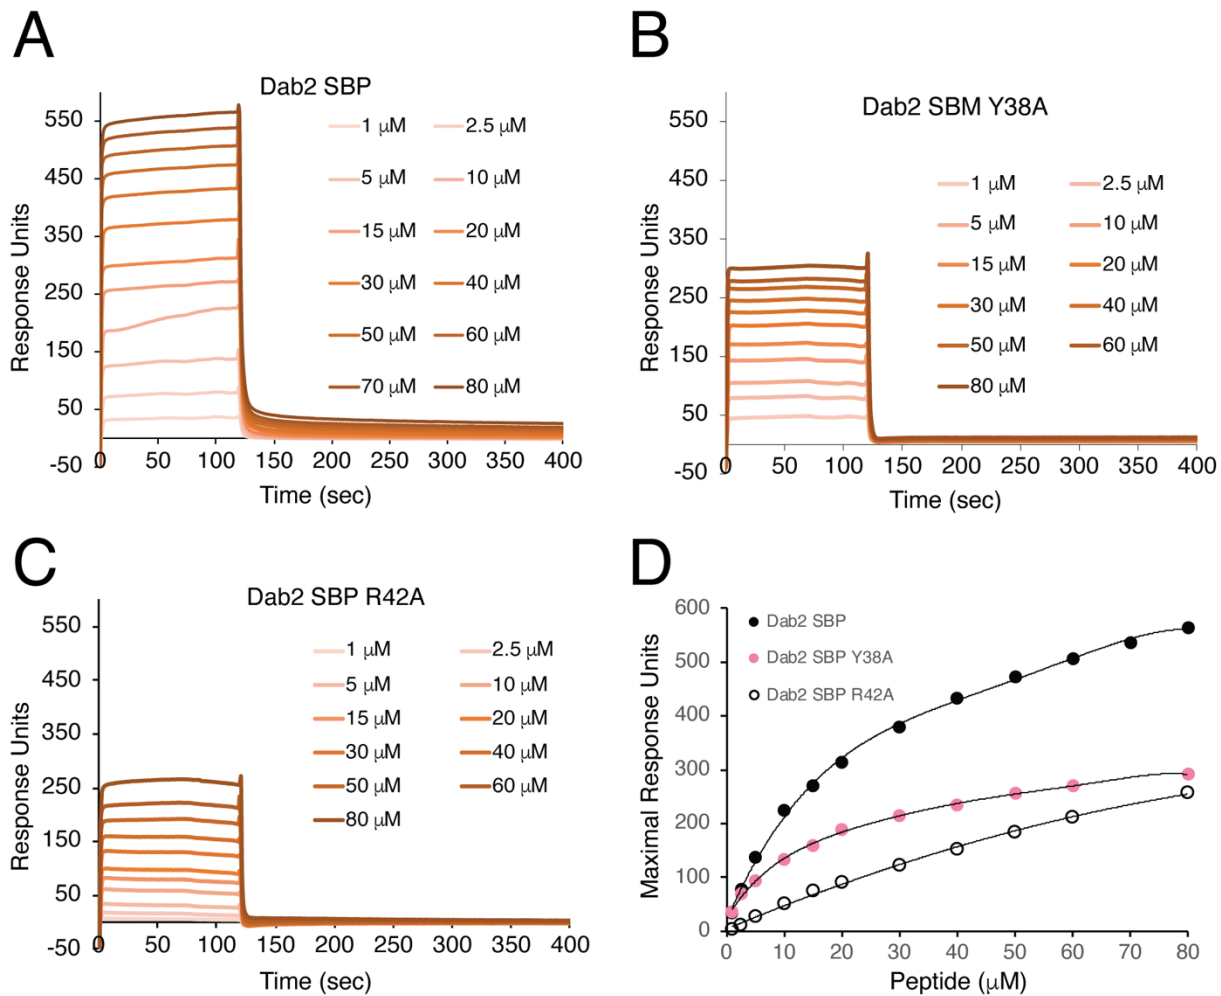

664

665

666 **Figure 5. Critical Dab2 SBP residues for binding of mimics of sulfatide-containing lipid bilayers. (A-**  
667 **C) SPR traces depicting the binding of Dab2 SBP (A), Dab2 SBP Y38A (B), and Dab2 SBP R42A (C)**  
668 **from 1 to 80  $\mu\text{M}$ , to sulfatide liposomes. (D) Plot representing the binding of Dab2 SBP (black circles),**  
669 **Dab2 Y38A (pink circles), and Dab2 SBP R42A (empty circles), from 1 to 80  $\mu\text{M}$ , to sulfatide-containing**  
670 **liposomes.**

671

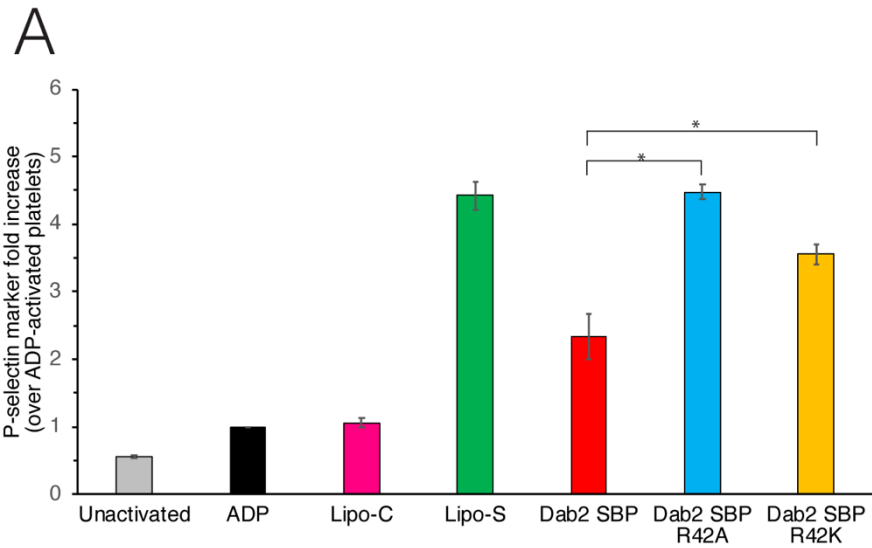

677

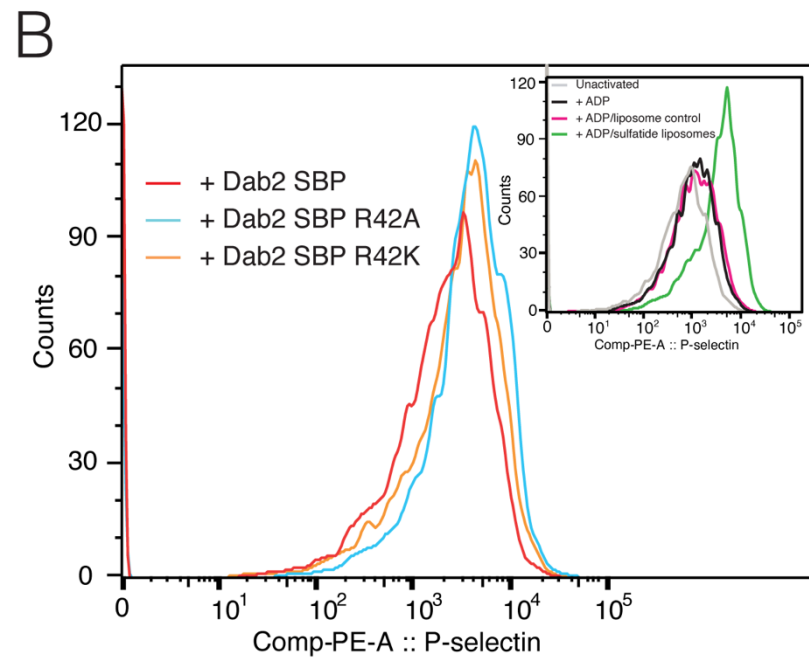

684

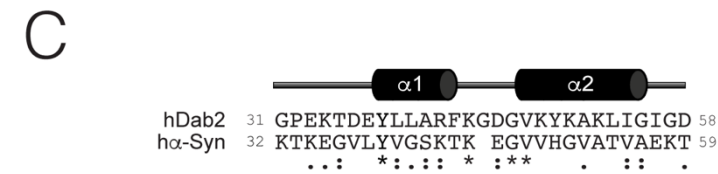

686

687 **Figure 6. Inhibition of sulfatide-induced platelet P-selectin surface expression in platelets by Dab2**  
 688 **SBP.** (A) Platelets were stimulated with ADP and further incubated with sulfatide-free or -containing  
 689 liposomes in the absence or presence of the indicated peptides. Samples then were fixed, incubated with

690 PE-labeled CD62P (anti-P-selectin) antibody, and analyzed by flow cytometry. The graph represents the  
691 median fluorescence intensity for each treatment (mean  $\pm$  standard deviation) of three independent  
692 experiments. Data is represented as a fold increase in fluorescence over ADP-treated platelets. Statistical  
693 analysis was carried out using a *t*-test. **(B)** Color-coded representative immunofluorescence histogram  
694 displaying the presence of platelet surface P-selectin for the treatments indicated in **A**. The black plot in the  
695 inset indicates the presence of P-selectin in the surface of unactivated platelets. **(C)** Comparison of the  $\alpha$ -  
696 synuclein sphingolipid-binding domain with the sulfatide-binding site of Dab2. Asterisks represent  
697 identical residues, whereas residues that share common properties are shown as colons. Per ClustalW  
698 criterium, semiconservative substitutions are indicated with dots.
